# Supplementary material
Source: publisher site journal article supplement (https://www.dovepress.com/article/265811)
Supplement: Supplementary file 1 [file get_supplementary_file.php]

**Supplementary material for the manuscript:**

**Value of Platelet Distribution Width and Mean Platelet Volume in Disease Activity Score of Rheumatoid Arthritis**

**Manuscript ID: 265811**

**Authors**

**Safaa A. A. Khaled <sup>1\*</sup>, Eman NasrELdin<sup>2</sup>, Yasmine S. Makarem <sup>3</sup>, Hamdy F. F. Mahmoud <sup>4, 5</sup>**

<sup>1</sup>Department of Internal Medicine, Clinical Hematology Unit, Assiut University Hospital/Unit of Bone Marrow Transplantation, South Egypt Cancer Institute, Faculty of Medicine, Assiut University, Egypt. <sup>2</sup>Department of Clinical Pathology, Assiut University Hospital, Faculty of Medicine, Assiut University, Egypt. <sup>3</sup>Department of Rheumatology , Rehabilitation and physical Medicine, Assiut University Hospital, Faculty of Medicine, Assiut University, Egypt. <sup>4</sup>Department of Statistics, Mathematics and Insurance, Faculty of Commerce, Assiut University, Egypt. <sup>5</sup>Department of Statistics, Virginia polytechnic institute and state University, Blacksburg, VA 24061, USA.

**\*Corresponding author:**

Dr. Safaa A. A. Khaled (Associate Professor- Department of Internal Medicine, Clinical Hematology Unit, Assiut University Hospital/Unit of Bone Marrow Transplantation South Egypt Cancer Institute, Faculty of Medicine , Assiut University, Egypt.

Email: [safaakhaled2003@gmail.com](mailto:safaakhaled2003@gmail.com)

[Postal code: 71515](#)

**Keywords:** Rheumatoid arthritis, platelet indices, disease activity.

**Supplementary table S1: Summary statistics of the assumed laboratory markers of inflammation.**

| Variable | Mean  | SD    | Minimum    | Maximum | IQR   | Skewness | Transformation | Skewness after transformation |
|----------|-------|-------|------------|---------|-------|----------|----------------|-------------------------------|
| ESR      | 36.9  | 35.1  | 4          | 140     | 48.25 | 1.27     | Log(ESR)       | 0.00                          |
| CRP      | 11.4  | 10.8  | <b>0.5</b> | 36      | 19.8  | 0.69     | Log(CRP)       | -0.18                         |
| Plt.     | 294.1 | 118.4 | 125        | 760     | 118   | 1.65     | Log(Plt)       | 0.29                          |
| PDW      | 25.1  | 17.6  | 7.6        | 71      | 32.5  | 0.98     | $1/\sqrt{PDW}$ | -0.32                         |
| MPV      | 8.5   | 1.1   | 6.2        | 12.5    | 1.6   | 0.63     | Log(MPV)       | 0.15                          |
| PCT      | 0.25  | 0.11  | 0.15       | 1.3     | 0.08  | 6.35     | 1/PCT          | -0.43                         |

CRP, C-reactive protein; ESR, erythrocyte sedimentation rate; Plt, platelet count; PCT, plateletcrit; PDW platelet distribution width; MPV, mean platelet volume.

**Supplementary table S2: Pearson's coefficient of correlations among the assumed inflammatory parameters and P-values.**

|      | ESR             | CRP             | Plt             | PDW           | MPV          |
|------|-----------------|-----------------|-----------------|---------------|--------------|
| CRP  | 0.713(0.000)**  | -----           | -----           | -----         | -----        |
| Plt. | 0.393(0.000)**  | 0.181(0.045)*   | -----           | -----         | -----        |
| PDW  | 0.479(0.000)**  | 0.495(0.000)**  | 0.108(0.188)    | -----         | -----        |
| MPV  | -0.302(0.000)** | -0.307(0.001)** | -0.395(0.000)** | 0.054(0.509)  | -----        |
| PCT  | -0.018(0.831)   | 0.403(0.076)    | -0.090(0.270)   | -0.005(0.951) | 0.100(0.220) |

CRP, C-reactive protein; ESR, erythrocyte sedimentation rate; plt, platelet count; PCT, plateletcrit ; PDW, platelet distribution width; MPV, mean platelet volume.\* The relationship was significant at 5%. \*\* The relationship was significant at 1%.

**Supplementary table S3: The coefficient values (Coef) of the variables included in the regression equation of EgyDAS along with standard errors (SE), T-values, P-values and variance inflation factor (VIF) values.**

| Variables included in EgyDAS | Coef  | SE Coef | T-value | P-value | VIF  |
|------------------------------|-------|---------|---------|---------|------|
| Constant                     | 5.78  | 0.387   | 14.96   | 0.00    |      |
| ln(ESR)                      | 0.65  | 0.034   | 19.03   | 0.00    | 3.85 |
| ln(CRP)                      | 0.37  | 0.027   | 14.01   | 0.00    | 3.31 |
| $1/\sqrt{PDW}$               | -7.47 | 0.364   | -20.52  | 0.00    | 1.74 |
| ln(MPV)                      | 3.09  | 0.152   | -20.29  | 0.00    | 1.15 |

CRP, C-reactive protein; ESR, erythrocyte sedimentation rate; PDW, platelet distribution width; MPV, mean platelet volume.

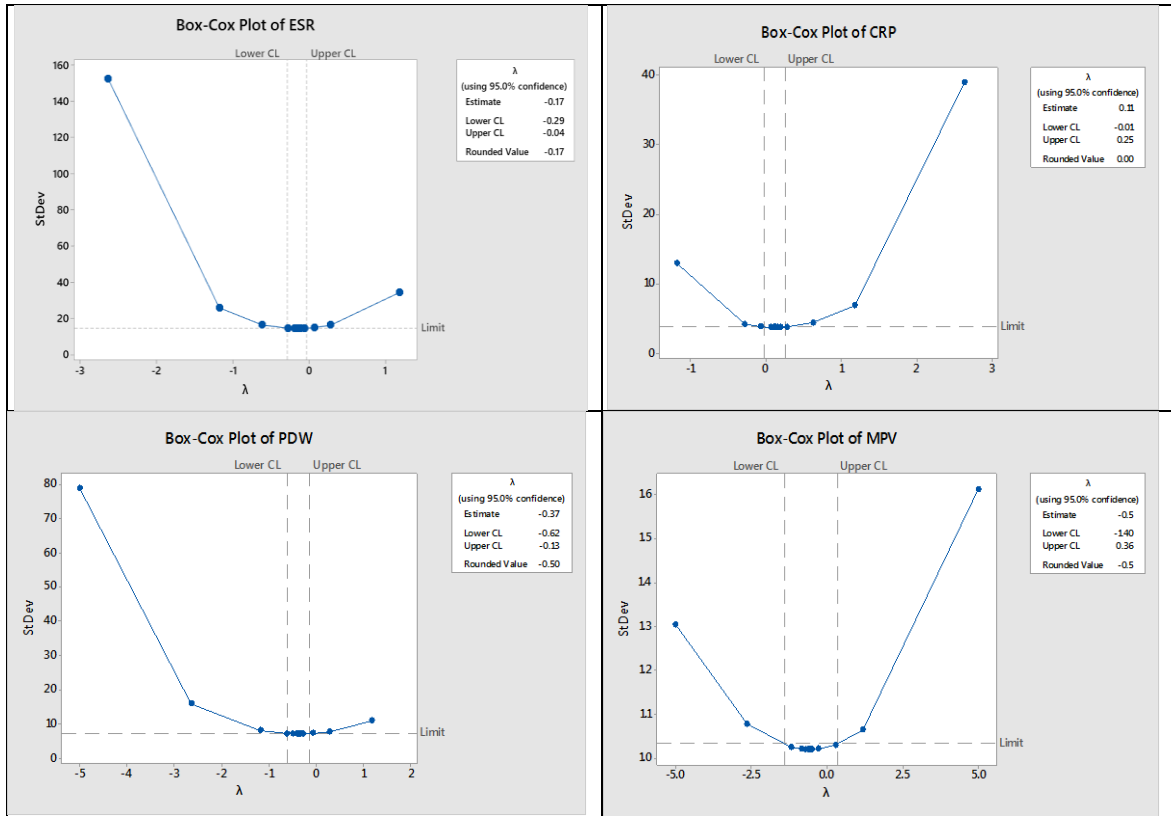

Supplementary figure S1: Cox-Box plots for the parameters included in EgyDAS equation.

These plots suggest using logarithm transformation for ESR, CRP and MPV, and inverted square root for PDW. CRP, C-reactive protein; ESR, erythrocyte sedimentation rate; PDW, platelet distribution width; MPV, mean platelet volume.
